# Supplementary material
Source: Research Square preprint supplement (doi:10.21203/rs.3.rs-8634723/v1)
Supplement: Supplementary file 1 [file 433eab481b7f07f26b245670.xlsx]

## Sheet: TableS1
Table S1. Hyperparameters
Hyperparameter	Option	Selection
Aggregator for neighbors	(max, mean, sum)	max
Combination of host and neighbor	(sum, concat)	sum
R: reference network	(3,20)	R = 11 for CCLE and R = 6 for GDSC1 and GDSC2
N: # neighbor nodes	(3,20)	Same as R
Activation for NN	(ReLU, Tanh, or Sigmoid)	ReLU
Activation for GraphSAGE	(ReLU, Tanh, or Sigmoid)	Sigmoid

## Sheet: TableS2
TableS2. Top pathways related to each drug from CCLE
Drug	Target(s)	Mechanism of action	Top 3 pathways for the best model	SHAP value	Top 3 pathways most correlated with the drug based on train_R2		Top 3 pathways most correlated with the drug based on test_R2
17-AAG	HSP90	Heat Shock Protein 90 (hsp90) Inhibitor	KEGG_SELENOAMINO_ACID_METABOLISM	0.144764	All	0.148851	KEGG_FC_EPSILON_RI_SIGNALING_PATHWAY	0.2048
17-AAG			KEGG_GLIOMA	0.143832	KEGG_NOD_LIKE_RECEPTOR_SIGNALING_PATHWAY	0.144014	KEGG_HYPERTROPHIC_CARDIOMYOPATHY_HCM	0.192583
17-AAG			KEGG_EPITHELIAL_CELL_SIGNALING_IN_HELICOBACTER_PYLORI_INFECTION	0.118325	KEGG_EPITHELIAL_CELL_SIGNALING_IN_HELICOBACTER_PYLORI_INFECTION	0.119388	KEGG_TRYPTOPHAN_METABOLISM	0.155116
AEW541	IGF-1R	IGF-1R Inhibitor	KEGG_REGULATION_OF_ACTIN_CYTOSKELETON	0.136914	KEGG_GLYCEROLIPID_METABOLISM	0.182994	KEGG_PRION_DISEASES	0.231419
AEW541			KEGG_ACUTE_MYELOID_LEUKEMIA	0.116572	KEGG_ALDOSTERONE_REGULATED_SODIUM_REABSORPTION	0.180162	KEGG_FRUCTOSE_AND_MANNOSE_METABOLISM	0.181818
AEW541			KEGG_VEGF_SIGNALING_PATHWAY	0.110155	KEGG_BASAL_CELL_CARCINOMA	0.155392	KEGG_PORPHYRIN_AND_CHLOROPHYLL_METABOLISM	0.156424
AZD0530	Src, Abl/Bcr-Abl, EGFR	Src and Abl inhibitor	KEGG_MELANOGENESIS	0.111715	KEGG_CYSTEINE_AND_METHIONINE_METABOLISM	0.346643	KEGG_CYSTEINE_AND_METHIONINE_METABOLISM	0.288041
AZD0530			KEGG_TOLL_LIKE_RECEPTOR_SIGNALING_PATHWAY	0.0942695	KEGG_NATURAL_KILLER_CELL_MEDIATED_CYTOTOXICITY	0.280252	KEGG_DRUG_METABOLISM_OTHER_ENZYMES	0.287921
AZD0530			KEGG_EPITHELIAL_CELL_SIGNALING_IN_HELICOBACTER_PYLORI_INFECTION	0.0895593	KEGG_CARDIAC_MUSCLE_CONTRACTION	0.227147	KEGG_GLYCINE_SERINE_AND_THREONINE_METABOLISM	0.274227
AZD6244	MEK	MEK1 and MEK2 Inhibitor	KEGG_GLYCOLYSIS_GLUCONEOGENESIS	0.106692	KEGG_ANTIGEN_PROCESSING_AND_PRESENTATION	0.153471	KEGG_PORPHYRIN_AND_CHLOROPHYLL_METABOLISM	0.244428
AZD6244			KEGG_EPITHELIAL_CELL_SIGNALING_IN_HELICOBACTER_PYLORI_INFECTION	0.103773	KEGG_FC_EPSILON_RI_SIGNALING_PATHWAY	0.144446	KEGG_P53_SIGNALING_PATHWAY	0.180318
AZD6244			KEGG_ADHERENS_JUNCTION	0.097365	KEGG_PRIMARY_IMMUNODEFICIENCY	0.134041	KEGG_ERBB_SIGNALING_PATHWAY	0.168185
Erlotinib	EGFR	EGFR Inhibitor	KEGG_TGF_BETA_SIGNALING_PATHWAY	0.195214	KEGG_FC_GAMMA_R_MEDIATED_PHAGOCYTOSIS	0.227987	KEGG_FC_EPSILON_RI_SIGNALING_PATHWAY	0.307507
Erlotinib			KEGG_GLYCEROPHOSPHOLIPID_METABOLISM	0.153707	KEGG_NEUROACTIVE_LIGAND_RECEPTOR_INTERACTION	0.226739	KEGG_GAP_JUNCTION	0.306223
Erlotinib			KEGG_WNT_SIGNALING_PATHWAY	0.131359	KEGG_LONG_TERM_POTENTIATION	0.218962	KEGG_WNT_SIGNALING_PATHWAY	0.299406
Irinotecan	Topoisomerase I	DNA Topoisomerase I Inhibitor	KEGG_WNT_SIGNALING_PATHWAY	0.135113	KEGG_PRIMARY_IMMUNODEFICIENCY	0.287417	KEGG_ABC_TRANSPORTERS	0.268083
Irinotecan			KEGG_ENDOCYTOSIS	0.130009	KEGG_JAK_STAT_SIGNALING_PATHWAY	0.184458	KEGG_ALDOSTERONE_REGULATED_SODIUM_REABSORPTION	0.246157
Irinotecan			All	0.126251	KEGG_CELL_CYCLE	0.174701	KEGG_SELENOAMINO_ACID_METABOLISM	0.228695
L-685458	Gamma Secretase	gamma-Secretase Inhibitor	KEGG_LONG_TERM_DEPRESSION	0.15341	KEGG_LEUKOCYTE_TRANSENDOTHELIAL_MIGRATION	0.193651	KEGG_ARGININE_AND_PROLINE_METABOLISM	0.340726
L-685458			KEGG_FC_GAMMA_R_MEDIATED_PHAGOCYTOSIS	0.116697	KEGG_MELANOGENESIS	0.151551	KEGG_JAK_STAT_SIGNALING_PATHWAY	0.211137
L-685458			KEGG_PORPHYRIN_AND_CHLOROPHYLL_METABOLISM	0.113678	KEGG_SPHINGOLIPID_METABOLISM	0.14321	KEGG_SELENOAMINO_ACID_METABOLISM	0.183666
Lapatinib	EGFR, HER2	EGFR and HER2 Inhibitor	KEGG_PPAR_SIGNALING_PATHWAY	0.135116	KEGG_ERBB_SIGNALING_PATHWAY	0.289493	KEGG_TRYPTOPHAN_METABOLISM	0.276952
Lapatinib			KEGG_HEDGEHOG_SIGNALING_PATHWAY	0.111819	KEGG_LEUKOCYTE_TRANSENDOTHELIAL_MIGRATION	0.266391	KEGG_CYTOKINE_CYTOKINE_RECEPTOR_INTERACTION	0.238176
Lapatinib			KEGG_RIG_I_LIKE_RECEPTOR_SIGNALING_PATHWAY	0.10983	KEGG_CHRONIC_MYELOID_LEUKEMIA	0.215494	KEGG_NATURAL_KILLER_CELL_MEDIATED_CYTOTOXICITY	0.220558
LBW242	IAP	Inhibitor of Apoptosis Proteins (IAP) Inhibitor	KEGG_LEUKOCYTE_TRANSENDOTHELIAL_MIGRATION	0.101965	KEGG_SMALL_CELL_LUNG_CANCER	0.356712	KEGG_AXON_GUIDANCE	0.390291
LBW242			KEGG_SPHINGOLIPID_METABOLISM	0.0886903	KEGG_BUTANOATE_METABOLISM	0.350183	KEGG_NICOTINATE_AND_NICOTINAMIDE_METABOLISM	0.349499
LBW242			KEGG_SMALL_CELL_LUNG_CANCER	0.086199	KEGG_ANTIGEN_PROCESSING_AND_PRESENTATION	0.328929	KEGG_ALANINE_ASPARTATE_AND_GLUTAMATE_METABOLISM	0.339022
Nilotinib	Abl/Bcr-Abl	Abl Inhibitor	KEGG_CHRONIC_MYELOID_LEUKEMIA	0.161888	KEGG_PROSTATE_CANCER	0.577966	KEGG_RIG_I_LIKE_RECEPTOR_SIGNALING_PATHWAY	0.547567
Nilotinib			KEGG_VASCULAR_SMOOTH_MUSCLE_CONTRACTION	0.111616	KEGG_BLADDER_CANCER	0.574821	KEGG_THYROID_CANCER	0.519616
Nilotinib			KEGG_HEDGEHOG_SIGNALING_PATHWAY	0.111577	KEGG_RIG_I_LIKE_RECEPTOR_SIGNALING_PATHWAY	0.570369	KEGG_ALDOSTERONE_REGULATED_SODIUM_REABSORPTION	0.508731
Nutlin-3	MDM2	MDM2 Inhibitor	KEGG_ADIPOCYTOKINE_SIGNALING_PATHWAY	0.119928	KEGG_SELENOAMINO_ACID_METABOLISM	0.438848	KEGG_P53_SIGNALING_PATHWAY	0.250813
Nutlin-3			KEGG_ENDOCYTOSIS	0.110113	KEGG_EPITHELIAL_CELL_SIGNALING_IN_HELICOBACTER_PYLORI_INFECTION	0.418674	KEGG_RIG_I_LIKE_RECEPTOR_SIGNALING_PATHWAY	0.248449
Nutlin-3			KEGG_HYPERTROPHIC_CARDIOMYOPATHY_HCM	0.10783	KEGG_SPHINGOLIPID_METABOLISM	0.404668	KEGG_PPAR_SIGNALING_PATHWAY	0.248281
Paclitaxel	beta-tubulin	Microtubule-Stabilizing Agents	KEGG_GLYCEROLIPID_METABOLISM	0.13618	KEGG_CYTOSOLIC_DNA_SENSING_PATHWAY	0.22465	KEGG_LONG_TERM_DEPRESSION	0.260282
Paclitaxel			KEGG_DRUG_METABOLISM_OTHER_ENZYMES	0.130154	KEGG_MELANOGENESIS	0.206049	KEGG_LONG_TERM_POTENTIATION	0.212373
Paclitaxel			KEGG_SELENOAMINO_ACID_METABOLISM	0.125254	KEGG_JAK_STAT_SIGNALING_PATHWAY	0.203624	KEGG_CARDIAC_MUSCLE_CONTRACTION	0.210609
Panobinostat	HDAC	Histone Deacetylase (HDAC) Inhibitor	KEGG_MAPK_SIGNALING_PATHWAY	0.149811	KEGG_GLYCEROLIPID_METABOLISM	0.164056	KEGG_MAPK_SIGNALING_PATHWAY	0.155932
Panobinostat			KEGG_CELL_CYCLE	0.136782	KEGG_PORPHYRIN_AND_CHLOROPHYLL_METABOLISM	0.12198	KEGG_TRYPTOPHAN_METABOLISM	0.134317
Panobinostat			KEGG_NOTCH_SIGNALING_PATHWAY	0.124454	KEGG_HEDGEHOG_SIGNALING_PATHWAY	0.100114	KEGG_GLYCEROLIPID_METABOLISM	0.131461
PD-0325901	MEK	MEK1 and MEK2 Inhibitor	KEGG_LONG_TERM_DEPRESSION	0.118536	KEGG_CHEMOKINE_SIGNALING_PATHWAY	0.191911	KEGG_CELL_ADHESION_MOLECULES_CAMS	0.363
PD-0325901			KEGG_OOCYTE_MEIOSIS	0.105362	KEGG_CALCIUM_SIGNALING_PATHWAY	0.137222	KEGG_P53_SIGNALING_PATHWAY	0.233879
PD-0325901			All	0.104498	KEGG_PRIMARY_IMMUNODEFICIENCY	0.109355	KEGG_OOCYTE_MEIOSIS	0.225407
PD-0332991	CDK4/6	CDK4/6 Inhibitor	KEGG_HEDGEHOG_SIGNALING_PATHWAY	0.171691	KEGG_HOMOLOGOUS_RECOMBINATION	0.208257	KEGG_CHRONIC_MYELOID_LEUKEMIA	0.331893
PD-0332991			KEGG_ALDOSTERONE_REGULATED_SODIUM_REABSORPTION	0.136384	KEGG_NICOTINATE_AND_NICOTINAMIDE_METABOLISM	0.194107	KEGG_SELENOAMINO_ACID_METABOLISM	0.322136
PD-0332991			KEGG_EPITHELIAL_CELL_SIGNALING_IN_HELICOBACTER_PYLORI_INFECTION	0.132785	KEGG_SPHINGOLIPID_METABOLISM	0.188563	KEGG_VIRAL_MYOCARDITIS	0.273555
PF2341066	c-MET, ALK	c-MET and ALK Inhibitor	KEGG_CYTOSOLIC_DNA_SENSING_PATHWAY	0.106023	KEGG_FOCAL_ADHESION	0.299394	KEGG_PROGESTERONE_MEDIATED_OOCYTE_MATURATION	0.298782
PF2341066			KEGG_CHEMOKINE_SIGNALING_PATHWAY	0.104199	KEGG_ARGININE_AND_PROLINE_METABOLISM	0.289961	KEGG_T_CELL_RECEPTOR_SIGNALING_PATHWAY	0.292877
PF2341066			KEGG_ECM_RECEPTOR_INTERACTION	0.103768	KEGG_LEUKOCYTE_TRANSENDOTHELIAL_MIGRATION	0.282904	KEGG_ECM_RECEPTOR_INTERACTION	0.275632
PHA-665752	c-MET	c-MET Inhibitor	KEGG_TGF_BETA_SIGNALING_PATHWAY	0.184872	KEGG_ECM_RECEPTOR_INTERACTION	0.582934	KEGG_ECM_RECEPTOR_INTERACTION	0.412193
PHA-665752			KEGG_GLYCOLYSIS_GLUCONEOGENESIS	0.163831	KEGG_SELENOAMINO_ACID_METABOLISM	0.494065	KEGG_ANTIGEN_PROCESSING_AND_PRESENTATION	0.377306
PHA-665752			KEGG_RIG_I_LIKE_RECEPTOR_SIGNALING_PATHWAY	0.103937	KEGG_METABOLISM_OF_XENOBIOTICS_BY_CYTOCHROME_P450	0.493045	KEGG_GNRH_SIGNALING_PATHWAY	0.350903
PLX4720	RAF	Raf kinase B Inhibitor	KEGG_PORPHYRIN_AND_CHLOROPHYLL_METABOLISM	0.173555	KEGG_GLYCEROLIPID_METABOLISM	0.245341	KEGG_REGULATION_OF_ACTIN_CYTOSKELETON	0.352163
PLX4720			KEGG_P53_SIGNALING_PATHWAY	0.12001	KEGG_HEDGEHOG_SIGNALING_PATHWAY	0.241944	KEGG_NEUROACTIVE_LIGAND_RECEPTOR_INTERACTION	0.293621
PLX4720			KEGG_GLIOMA	0.099857	KEGG_PPAR_SIGNALING_PATHWAY	0.215914	KEGG_PPAR_SIGNALING_PATHWAY	0.285857
RAF265	Raf kinase B, KDR	Raf kinase B and KDR Inhibitor	KEGG_FOCAL_ADHESION	0.126966	KEGG_GLYCEROLIPID_METABOLISM	0.157348	KEGG_CARDIAC_MUSCLE_CONTRACTION	0.287393
RAF265			KEGG_INOSITOL_PHOSPHATE_METABOLISM	0.11033	KEGG_REGULATION_OF_ACTIN_CYTOSKELETON	0.128929	KEGG_INOSITOL_PHOSPHATE_METABOLISM	0.250093
RAF265			KEGG_GAP_JUNCTION	0.105744	KEGG_GNRH_SIGNALING_PATHWAY	0.122628	KEGG_TIGHT_JUNCTION	0.198908
Sorafenib	Flt3, C-KIT, PDGFRbeta, RET, Raf kinase B, Raf kinase C, VEGFR-1, KDR, FLT4	Multi-kinase inhibitor	KEGG_MAPK_SIGNALING_PATHWAY	0.142799	KEGG_CYTOKINE_CYTOKINE_RECEPTOR_INTERACTION	0.269271	KEGG_CHRONIC_MYELOID_LEUKEMIA	0.246553
Sorafenib			KEGG_LONG_TERM_POTENTIATION	0.140597	KEGG_PPAR_SIGNALING_PATHWAY	0.248665	KEGG_FC_GAMMA_R_MEDIATED_PHAGOCYTOSIS	0.241896
Sorafenib			All	0.131332	KEGG_LEISHMANIA_INFECTION	0.221386	KEGG_T_CELL_RECEPTOR_SIGNALING_PATHWAY	0.236256
TAE684	ALK	ALK Inhibitor	KEGG_NEUROTROPHIN_SIGNALING_PATHWAY	0.149252	KEGG_VASCULAR_SMOOTH_MUSCLE_CONTRACTION	0.0720312	KEGG_VEGF_SIGNALING_PATHWAY	0.162052
TAE684			KEGG_HEMATOPOIETIC_CELL_LINEAGE	0.101328	KEGG_FRUCTOSE_AND_MANNOSE_METABOLISM	0.0676028	KEGG_HEMATOPOIETIC_CELL_LINEAGE	0.148839
TAE684			KEGG_GLYCEROPHOSPHOLIPID_METABOLISM	0.100144	KEGG_INOSITOL_PHOSPHATE_METABOLISM	0.0546175	KEGG_COMPLEMENT_AND_COAGULATION_CASCADES	0.148335
TKI258	EGFR, FGFR1, PDGFRbeta, VEGFR-1, KDR	Multi-kinase inhibitor	KEGG_FRUCTOSE_AND_MANNOSE_METABOLISM	0.149543	KEGG_ALANINE_ASPARTATE_AND_GLUTAMATE_METABOLISM	0.162772	KEGG_TGF_BETA_SIGNALING_PATHWAY	0.172949
TKI258			KEGG_FC_EPSILON_RI_SIGNALING_PATHWAY	0.133378	KEGG_ARACHIDONIC_ACID_METABOLISM	0.133765	KEGG_PURINE_METABOLISM	0.11622
TKI258			KEGG_BASAL_CELL_CARCINOMA	0.125752	KEGG_ECM_RECEPTOR_INTERACTION	0.124584	KEGG_TOLL_LIKE_RECEPTOR_SIGNALING_PATHWAY	0.109979
ZD-6474	Abl, EGFR, Flt3, C-KIT, RET, VEGFR-1, KDR, FLT4	Multi-kinase inhibitor	KEGG_HEDGEHOG_SIGNALING_PATHWAY	0.101694	KEGG_SPHINGOLIPID_METABOLISM	0.168977	KEGG_APOPTOSIS	0.243132
ZD-6474			KEGG_SPHINGOLIPID_METABOLISM	0.0928036	KEGG_DRUG_METABOLISM_OTHER_ENZYMES	0.15718	KEGG_BUTANOATE_METABOLISM	0.216874
ZD-6474			KEGG_TYROSINE_METABOLISM	0.0883554	KEGG_GLYCEROLIPID_METABOLISM	0.123468	KEGG_VASCULAR_SMOOTH_MUSCLE_CONTRACTION	0.186751
